# Supplementary material
Source: Springer Nature journal article supplement (https://springermedizin.de/resource/supplementary/13063_2010_647_MOESM4_ESM.pdf/9618404)

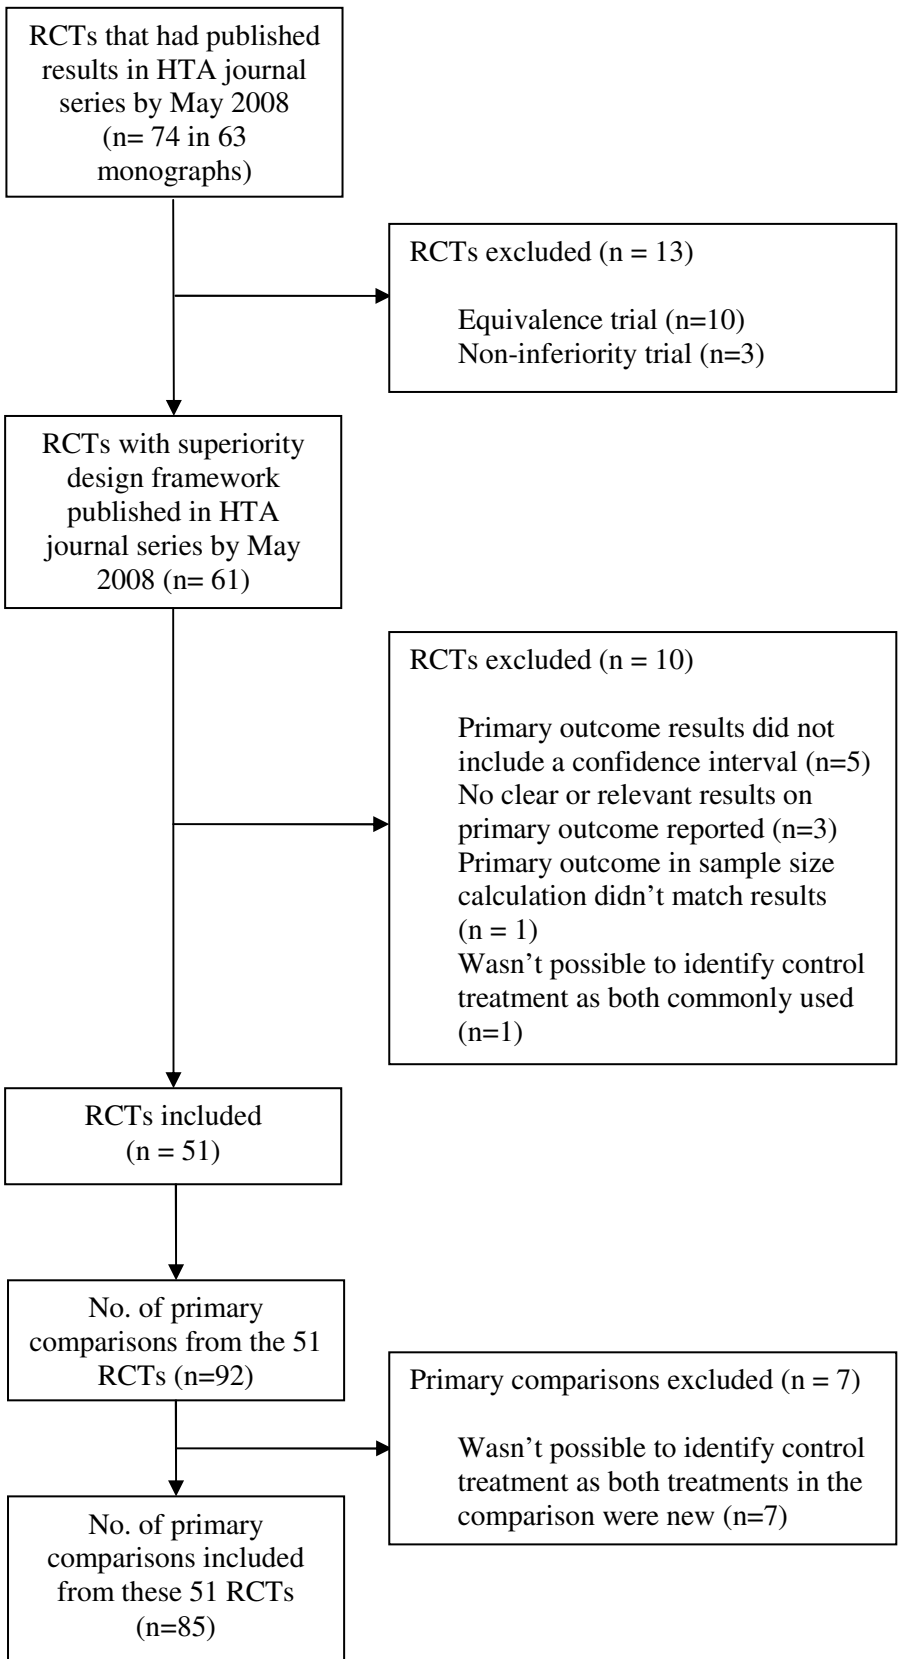

Supplement: MOESM4 [file 9618404]
